# Supplementary material
Source: Springer Nature journal article supplement (https://www.springermedizin.de/resource/supplementary/13023_2013_640_MOESM1_ESM.pdf/9642572)

**A**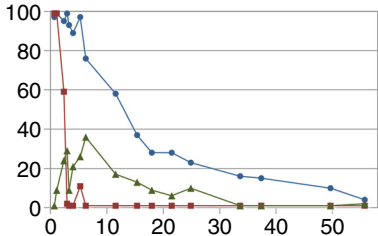**B**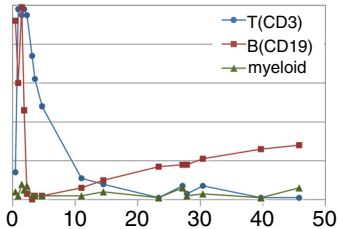

Supplement: MOESM1 [file 9642572]
